1 **Trophic consistency of supraspecific taxa in belowground invertebrate communities**

2 Anton M. Potapov<sup>\*1,2</sup>, Stefan Scheu<sup>1,3</sup>, Alexei V. Tiunov<sup>2</sup>

3 <sup>1</sup>University of Göttingen, J.F. Blumenbach Institute of Zoology and Anthropology, Untere

4 Karspüle 2, 37073 Göttingen, Germany

5 <sup>2</sup>Russian Academy of Sciences, A.N. Severtsov Institute of Ecology and Evolution, Leninsky

6 Prospect 33, 119071 Moscow, Russia

7 <sup>3</sup>University of Göttingen, Centre of Biodiversity and Sustainable Land Use, Von-Siebold-Str. 8,

8 37075 Göttingen, Germany

9

10 **\*Author for correspondence:**

11 Anton M. Potapov

12 E-mail: [potapov.msu@gmail.com](mailto:potapov.msu@gmail.com)

13 Phone: +49 551 3928500

14 **Abstract**

- 15 1. Animals that have similar morphological traits are expected to share similar  
16 ecological niches. This statement applies to individual animals within a species  
17 and thus species often serve as the functional units in ecological studies. Species  
18 are further grouped into higher-ranked taxonomic units based on their  
19 morphological similarity and thus are also expected to be ecologically similar. On  
20 the other hand, theory predicts that strong competition between closely related  
21 species can lead to differentiation of ecological niches. Due to a high diversity  
22 and limited taxonomic expertise, soil food webs are often resolved using  
23 supraspecific taxa such as families, orders or even classes as functional units.
- 24 2. Here we for the first time empirically tested the trophic consistency of  
25 supraspecific taxa across major lineages of temperate forest soil invertebrates:  
26 Annelida, Chelicerata, Myriapoda, Crustacea and Hexapoda. Published data on  
27 stable isotope compositions of carbon and nitrogen were used to infer basal  
28 resources and trophic level, and explore the relationship between taxonomic and  
29 trophic dissimilarity of local populations.
- 30 3. Genera and families had normal and unimodal distributions of isotope niches,  
31 suggesting that supraspecific taxa are trophically consistent. The isotopic niche of  
32 populations across different localities is better predicted by species than by  
33 supraspecific taxa. However, within the same genus, the effect of species identity  
34 on stable isotope composition of populations was not significant in 92% of cases.  
35 The link to basal resources, i.e. plants or detritus, was convergent in different  
36 lineages, while trophic levels followed the Brownian motion taxonomic model.  
37 Virtually none of the studied taxa showed pronounced trophic niche conservatism  
38 within a lineage.

39           4. Supraspecific taxa are meaningful as functional units in ecological studies, but the  
40           consistency varies among taxa and thus the choice of taxonomic resolution  
41           depends on the research question; generally, identification of taxa should be more  
42           detailed in more diverse taxonomic groups. We compiled a comprehensive list of  
43           mean  $\Delta^{13}\text{C}$  and  $\Delta^{15}\text{N}$  values of invertebrate taxa from temperate forest soils  
44           allowing to refine soil food-web models when identification to species level is not  
45           feasible.

46

47   **Key words:**

48   Arthropoda, niche conservatism, phylogenetic signal, soil food web, taxonomic sufficiency,  
49   taxonomic resolution, trophic niche

## 50 **Introduction**

51 Shared ancestry typically is associated with ecological similarity, with closely related  
52 species having similar traits and therefore similar ecological niches (Webb, 2000; Webb,  
53 Ackerly, McPeck, & Donoghue, 2002). Such similarity results from ‘evolutionary inertia’ and is  
54 referred to as phylogenetic signal (Blomberg & Garland, 2002). The inertia is likely supported  
55 by the ancestral constraint mechanisms, i.e. the property of a trait that, although possibly  
56 adaptive in the environment in which it originally evolved, acts to place limits on the evolution  
57 of new phenotypic variants (Blomberg & Garland, 2002; Pyron, Costa, Patten, & Burbrink,  
58 2015). Notably, not only the trait itself can be conserved but also its potential to vary. This  
59 concept was formalized in the early 20th century by N. Vavilov in “*The law of homology series*  
60 *in genetical mutability*” (1935) and implies that related species tend to evolve similar phenotypic  
61 traits.

62 As a result of evolutionary inertia, taxonomically related species may respond similarly  
63 to environmental factors and perform similar ecosystem functions, since the organisms that share  
64 similar morphology are likely to share a similar ecological niche (Wainwright & Richard, 1995).  
65 Moreover, supraspecific taxa are suggested to behave as ecological units forming the structural  
66 parts of ecosystems (Chernov, 2008). The taxonomic level to which ecological characteristics of  
67 species can be extrapolated with a minimum loss of information, i.e. “taxonomic sufficiency”, is  
68 an important question in basic and applied ecology (Ellis, 1985; Terlizzi, Bevilacqua, Frascchetti,  
69 & Boero, 2003). For instance, a moderate level of taxonomic aggregation (genera or even  
70 families) can be sufficient to indicate effects of environmental changes on the composition of  
71 benthic and soil invertebrates communities (Jiang et al., 2013; Minor, Ermilov, & Tiunov, 2017).  
72 Loss of information due to taxonomic aggregation likely is more pronounced in more diverse  
73 groups (Timms, Bowden, Summerville, & Buddle, 2013), but the ecological consistency of taxa  
74 at different taxonomic levels has never been tested empirically.

75 Ecological similarity among related species usually is investigated in respect to  
76 morphology, physiology and behaviour of organisms, with behavioural adaptations being  
77 evolutionarily more labile (Blomberg, Garland, Ives, & Crespi, 2003; Böhning-Gaese &  
78 Oberrath, 1999). As a complex trait, trophic niches may either be similar or differ considerably  
79 among closely related taxa. Feeding habits of an organism are not strongly related to its  
80 taxonomic position since similar feeding strategies occur in many lineages (i.e., convergence in  
81 trophic positions). Pronounced trophic-niche differentiation between species was shown for  
82 dominant groups of soil detritivores (Chahartaghi, Langel, Scheu, & Ruess, 2005; Schneider et  
83 al., 2004). Nevertheless, supraspecific taxa often are used as trophic species (nodes) in soil food  
84 web models (Berg & Bengtsson, 2007; de Ruiter, Neutel, & Moore, 1994; de Vries et al., 2013).  
85 Despite trophic guilds conceptually are independent of taxonomy, taxonomically related species  
86 usually are included in the same trophic guild (Simberloff & Dayan, 1991). This assumption  
87 recently has received empirical support in freshwater (catfishes) and soil (springtails)  
88 detritivores, for which trophic niches were shown to differ between supraspecific taxa (Lujan,  
89 Winemiller, & Armbruster, 2012; Potapov, Semenina, Korotkevich, Kuznetsova, & Tiunov,  
90 2016). Moreover, it has been argued that ecological links between species (e.g., via trophic  
91 interactions) often are related to their phylogenetic position (Gómez, Verdú, & Perfectti, 2010;  
92 Rezende, Lavabre, Guimarães, Jordano, & Bascompte, 2007). In marine communities predators  
93 tend to consume phylogenetically related prey species and prey tend to be consumed by  
94 phylogenetically related predators (Eklöf & Stouffer, 2016). However, it remains unclear if this  
95 also holds true for taxa in terrestrial belowground communities with less pronounced size  
96 structure and high frequency of omnivorous species able to switch diet depending on its  
97 availability (Digel, Curtsdotter, Riede, Klarner, & Brose, 2014).

98 Three scenarios are suggested to explain the relationship between taxonomic relatedness  
99 of taxa and their dissimilarity in trophic niche. The ‘limiting similarity’ hypothesis suggests that  
100 morphological similarity of closely related taxa results in strong competition (Darwin, 1876;

101 Violle, Nemergut, Pu, & Jiang, 2011) and this may favour trophic niche divergence. Although  
102 trophic niches of species may be dissimilar, shared ancestral morphology should lead to the  
103 overlap of trophic niches of supraspecific taxa, such as genera and families (Fig. 1). The  
104 ‘random’ hypothesis suggests no changes in trophic-niche differentiation at different levels of  
105 taxonomic resolution (i.e., morphological dissimilarity is not related to trophic niche  
106 dissimilarity). The ‘taxonomic signal’ hypothesis suggests that closely related taxa have more  
107 similar trophic niches than distantly related taxa. Accordingly, supraspecific taxa are expected to  
108 occupy distinct trophic niches that reflect ancestral adaptations, while genera within families and  
109 species within genera differ only little.  
110

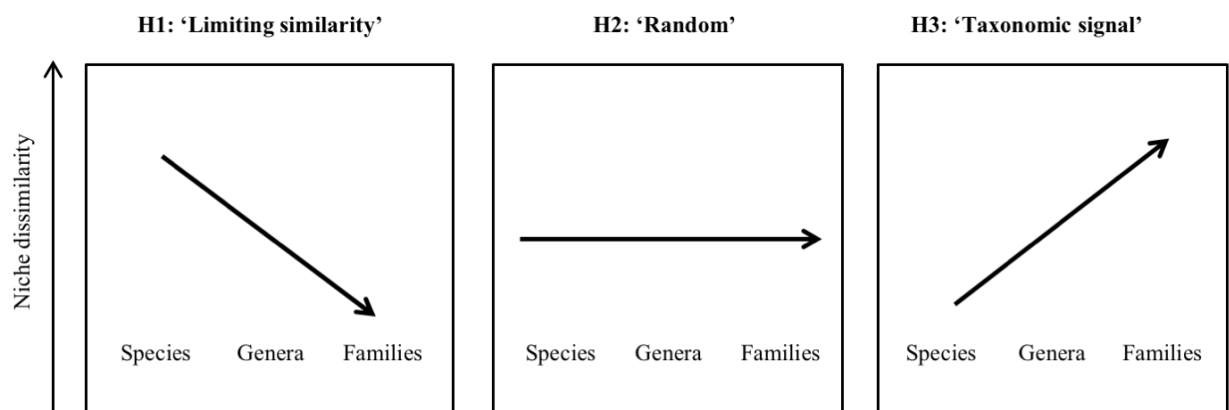

111  
112 **Figure 1.** Contrasting scenarios of niche differentiation among closely-related taxa. Hypothesis 1  
113 ('limiting similarity') suggests strong competition and trophic-niche divergence among closely-  
114 related taxa. Hypothesis 2 ('random') hypothesis suggests no relationship between taxonomic  
115 and trophic-niche dissimilarity. Hypothesis 3 ('taxonomic signal') suggests that closely related  
116 taxa have more similar trophic niches than distantly related taxa and that niche differentiation is  
117 increasing with increasing taxonomic level.

118  
119         The limitations of measuring trophic-niche dimensions *in situ* were partly overcome with  
120 the introduction of stable isotope analysis in ecological studies (Peterson & Fry, 1987). Natural  
121 variations in stable isotope ratios of carbon ( $^{13}\text{C}/^{12}\text{C}$ ) and nitrogen ( $^{15}\text{N}/^{14}\text{N}$ ) reflect the trophic

122 niche of species (Newsome, Martinez del Rio, Bearhop, & Phillips, 2007; Rodríguez & Herrera,  
123 2013) and provide information on their basal resources and trophic level, respectively (Boecklen,  
124 Yarnes, Cook, & James, 2011; Martinez del Rio, Wolf, Carleton, & Gannes, 2009). In soil food  
125 webs  $^{13}\text{C}$  concentrations increase with decomposition of plant material, while  $^{15}\text{N}$  concentrations  
126 increase with trophic level (Potapov et al., 2018). Based on these findings, we used published  
127 data on stable isotope composition of carbon and nitrogen to explore the trophic niches of major  
128 belowground arthropod lineages at different taxonomic levels. The following main questions  
129 were addressed: (1) Is there evidence for trophic niche conservatism (*sensu* Losos, 2008) in soil  
130 animal taxa? (2) Are supraspecific taxa in soil communities trophically consistent? (3) How  
131 much information about basal resources and trophic level of soil animals do we lose by using  
132 supraspecific taxa instead of species?

133

## 134 **Methods**

135 The analysis was based on a large compilation of published data on stable isotope  
136 composition of soil invertebrates from temperate forests (Potapov et al., 2018). In the dataset,  
137 only records identified to species or genus level were included resulting in 415 species from 21  
138 orders and 5 high-order taxa: Annelida, Chelicerata, Myriapoda, Crustacea and Hexapoda (Table  
139 S1). Each data record in the dataset comprised average stable isotope composition of species /  
140 taxa sampled at a local community with some species investigated at different localities /  
141 ecosystems resulting in a total of 961 local populations. Stable isotope compositions of carbon  
142 and nitrogen were normalized to the local leaf litter to account for inter-ecosystem variations and  
143 denoted as  $\Delta^{13}\text{C}$  and  $\Delta^{15}\text{N}$  values (Klarner et al., 2014). Further, each record was classified into  
144 the following taxonomic levels: Phylum, Subphylum, Class, Order, Family, Genus and Species,  
145 according to (Zhang, 2011). Although arbitrarily defined and varying between taxonomic  
146 groups, supraspecific taxa form a hierarchical system representing different levels of aggregation  
147 of species.

148 Statistical analyses were performed in R 3.4.0 with R studio interface (R Core Team,  
149 2017). To test if stable isotope composition of soil invertebrates is distributed non-randomly on  
150 the taxonomic tree, we analysed  $\Delta^{13}\text{C}$  and  $\Delta^{15}\text{N}$  values using Blomberg's K criterion in the  
151 package *phytools* (Revell, 2012). This criterion was developed to test for significance of  
152 phylogenetic signal, i.e. its non-random distribution on a phylogenetic tree, and allows  
153 comparisons of phylogenetic signal across traits and phylogenetic trees (Blomberg et al., 2003).  
154 Data were transformed to a tree using *as.phylo* in package *ape* (Paradis, Claude, & Strimmer,  
155 2004). The empirical Blomberg's K criteria were compared with 999 Brownian motion  
156 simulations (*fastBM*) in package *phytools*. Due to a positive skewness of the distribution, the  
157 95% confidence interval for simulated K criteria was calculated after log-transformation and was  
158 estimated as 0.62-1.81. K values below 0.62 indicate trophic-niche convergence among taxa  
159 (similar isotopic composition is observed in different lineages), while values above 1.81 indicate  
160 trophic-niche conservatism (different lineages have different isotopic composition; Losos, 2008).

161 According to the abovementioned hypotheses, we explored the relationship between  
162 isotopic dissimilarity and taxonomic dissimilarity of taxa at different taxonomic levels. Isotopic  
163 dissimilarity (as a proxy of trophic niche dissimilarity) was measured as Euclidean distance  
164 between populations'  $\Delta^{13}\text{C}$  and  $\Delta^{15}\text{N}$  values. Taxonomic dissimilarity was ranked from 1 to 8,  
165 with 1 denoting different populations of the same species, 2 denoting populations of different  
166 species of the same genus, 3 – populations of different genera of the same family, 4 –  
167 populations of different families of the same order, 5 – populations of different orders of the  
168 same class, 6 – populations of different classes of the same subphylum, 7 – populations of  
169 different subphyla of the same phylum, and 8 – populations of different phyla. Matrixes for  
170 isotopic and taxonomic dissimilarities were calculated using *daisy* in package *cluster* (Maechler,  
171 Rousseeuw, Struyf, Hubert, & Hornik, 2017). Subsequently, isotopic and taxonomic  
172 dissimilarity matrixes were correlated using Mantel test with 999 permutations (package *ade4*;  
173 (Dray, Dufour, & others, 2007). Medians and means of isotopic dissimilarity were compared



174 between taxonomic levels using Nemenyi test in package *PMCMR* (Pohlert, 2014) and general  
175 linear hypothesis for multiple comparisons in package *multcomp* (Hothorn, Bretz, & Westfall,  
176 2008), respectively. Both tests showed similar results; only results of the former are presented.

177 To test the trophic consistency of supraspecific taxa we visually explored the  
178 distributions of  $\Delta^{13}\text{C}$  or  $\Delta^{15}\text{N}$  values of all taxa at different taxonomic levels. To analyse all taxa  
179 together, we first calculated mean  $\Delta^{13}\text{C}$  and  $\Delta^{15}\text{N}$  values for all taxa at all taxonomic levels.  
180 Next, we calculated offsets of  $\Delta^{13}\text{C}$  and  $\Delta^{15}\text{N}$  values for populations from the mean values for all  
181 parental taxa. For example, to construct data distribution for the ‘family’ level, offsets for all  
182 populations were calculated using the mean values of the corresponding parental families. Only  
183 taxa with two or more nested taxa of the lower taxonomic level were included in the analysis  
184 (i.e., species with  $\geq 2$  populations, genera with  $\geq 2$  species, families with  $\geq 2$  genera etc.). Offsets  
185 were compared between taxonomic levels using general linear hypothesis for multiple  
186 comparisons in package *multcomp*.

187 To estimate how much information about basal resources and trophic level of soil  
188 animals is lost by using supraspecific taxa instead of species, we checked whether different  
189 species within the same parental taxon occupy significantly distinct trophic niches. For doing  
190 that, we inspected the effect of ‘species identity’ on the  $\Delta^{13}\text{C}$  or  $\Delta^{15}\text{N}$  values of populations using  
191 one-way ANOVAs. Only taxa with two or more nested taxa of the lower taxonomic level were  
192 included in the analysis. Thereafter, results of the ANOVA (effect of species / no effect of  
193 species as a binomial variable) were used to calculate percentage of taxa with significant species  
194 effect at different levels of taxonomic resolution.

195 Lastly, we inspected mean  $\Delta^{13}\text{C}$  and  $\Delta^{15}\text{N}$  values for individual subphyla, classes and  
196 orders across three major lineages of soil arthropods that were well represented in the dataset, i.e.  
197 Chelicerata, Myriapoda and Hexapoda. In this analysis we used the expanded dataset of 1146  
198 populations including those not identified to species level (Table S1).

199

## 200 **Results**

201           Based on the entire dataset both  $\Delta^{13}\text{C}$  and  $\Delta^{15}\text{N}$  values showed taxonomic signal, i.e.  
202 closely related taxonomic units shared basal resources and trophic levels more often than  
203 expected by random distribution ( $p = 0.001$  for both). Comparisons based on the Brownian  
204 motion model showed that trophic niches are not taxonomically conserved with  $\Delta^{13}\text{C}$  values  
205 being convergent among taxa (Blomberg's  $K = 0.50$ ) and  $\Delta^{15}\text{N}$  values distributed following the  
206 Brownian motion model ( $K = 0.87$ ).

207           Mean isotopic dissimilarity between populations in  $\Delta^{13}\text{C}$  values only slightly increased  
208 with taxonomic dissimilarity (Mantel test:  $R = 0.006$ , simulated  $p = 0.245$ ); by contrast, isotopic  
209 dissimilarity in  $\Delta^{15}\text{N}$  values increased steadily from the population to the class level but  
210 decreased thereafter ( $R = 0.065$ ,  $p = 0.001$ ; Fig. 2). Whereas populations of different species  
211 within a genus differed by 1.3‰ (a median), populations from different classes within a  
212 subphylum differed by 3.9‰.

213

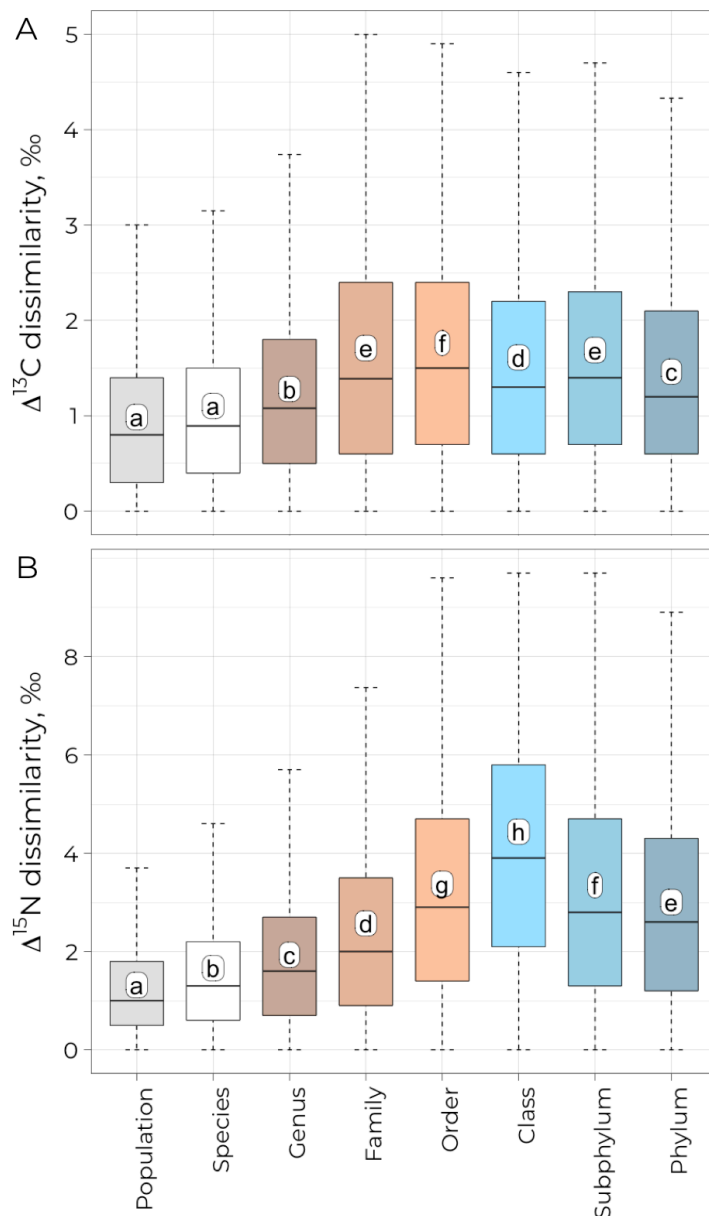

214

215 **Figure 2. Isotopic dissimilarity as related to taxonomic dissimilarity in soil invertebrates.**

216 Isotopic dissimilarity was measured as Euclidean distance in  $\Delta^{13}\text{C}$  or  $\Delta^{15}\text{N}$  values between

217 populations. Taxonomic dissimilarity is reflected by eight levels of taxonomic resolution: For

218 instance, ‘Population’ represents differences between populations of the same species, ‘Species’

219 represents differences between populations from different species of the same genus, ‘Genus’

220 represents differences between populations from different genera of the same family, etc.

221 Distances within groups are illustrated using boxplots with horizontal lines representing

222 medians; long upper tails in few cases were cut for clarity (2% of records for both  $\Delta^{13}\text{C}$  and

223  $\Delta^{15}\text{N}$ ). Means are indicated by white circles; letters refer to median comparison (Nemenyi test):

224 groups sharing the same letter are not significantly different. Isotopic and taxonomic  
225 dissimilarity were significantly correlated for  $\Delta^{15}\text{N}$  but not for  $\Delta^{13}\text{C}$  values (see text).

226

227         The variability of both  $\Delta^{13}\text{C}$  and  $\Delta^{15}\text{N}$  values increased continuously with decreasing  
228 level of taxonomic resolution. However, taxa from species to family level for  $\Delta^{15}\text{N}$  and from  
229 species to order level for  $\Delta^{13}\text{C}$  fitted normal and unimodal distribution (Fig. 3A, B), suggesting  
230 trophic consistency of taxa at these taxonomic levels. The offset of individual populations from  
231 the mean values of parental taxa continuously increased with decreasing taxonomic resolution  
232 until class and subphylum levels for  $\Delta^{13}\text{C}$  and  $\Delta^{15}\text{N}$  values, respectively (Fig. 3C, D). Average  
233 absolute offsets of  $\Delta^{13}\text{C}$  values were 0.6‰ for species and 0.8‰ for families; average offsets of  
234  $\Delta^{15}\text{N}$  values were 0.9‰ for species and 1.3‰ for families.

235

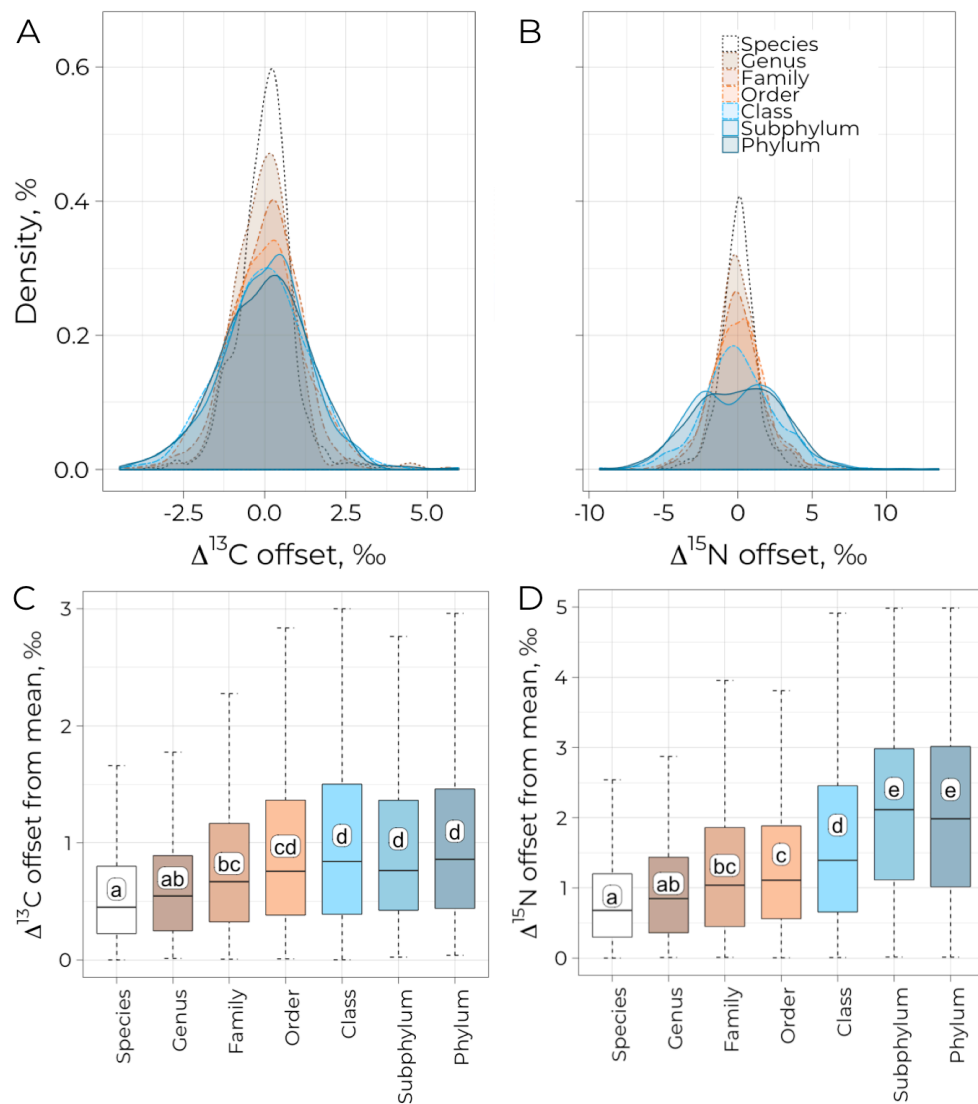

236

237 **Figure 3. Offsets in stable isotope composition of populations from means of parental taxa**

238 **of different taxonomic level.** Offsets were calculated as mean Δ<sup>13</sup>C (A, C) and Δ<sup>15</sup>N values (B,

239 D) for populations minus the mean value for parental taxonomic units, all data are plotted

240 together. E.g. ‘Family’ stands for offsets of individual populations from the mean of parental

241 families. Only taxa with two or more nested taxa of the lower taxonomic level were included in

242 the analysis (i.e., species with ≥ 2 populations, genera with ≥ 2 species, families with ≥ 2 genera

243 etc.). A and B: Offsets are displayed as the Kernel density estimation. C and D: Absolute offsets

244 are displayed as boxplots with horizontal lines representing medians. Means are indicated by

245 white circles; letters refer to median comparison (Nemenyi test): groups sharing the same letter

246 are not significantly different.

247

248 To estimate, to what extent information is lost by using supraspecific taxa instead of  
249 species, we tested for the effect of species on  $\Delta^{13}\text{C}$  and  $\Delta^{15}\text{N}$  values within each supraspecific  
250 taxa from genus to class level. Within genera, the effect of species was not significant in 92% of  
251 the cases for both  $\Delta^{13}\text{C}$  and  $\Delta^{15}\text{N}$  values (Supplementary Table S2). Within families, orders, and  
252 classes the effect of species on  $\Delta^{13}\text{C}$  values was not significant in 82, 45, and 20% of cases,  
253 respectively. The respective values for  $\Delta^{15}\text{N}$  values were 59, 45, and 0% (Fig. 4).

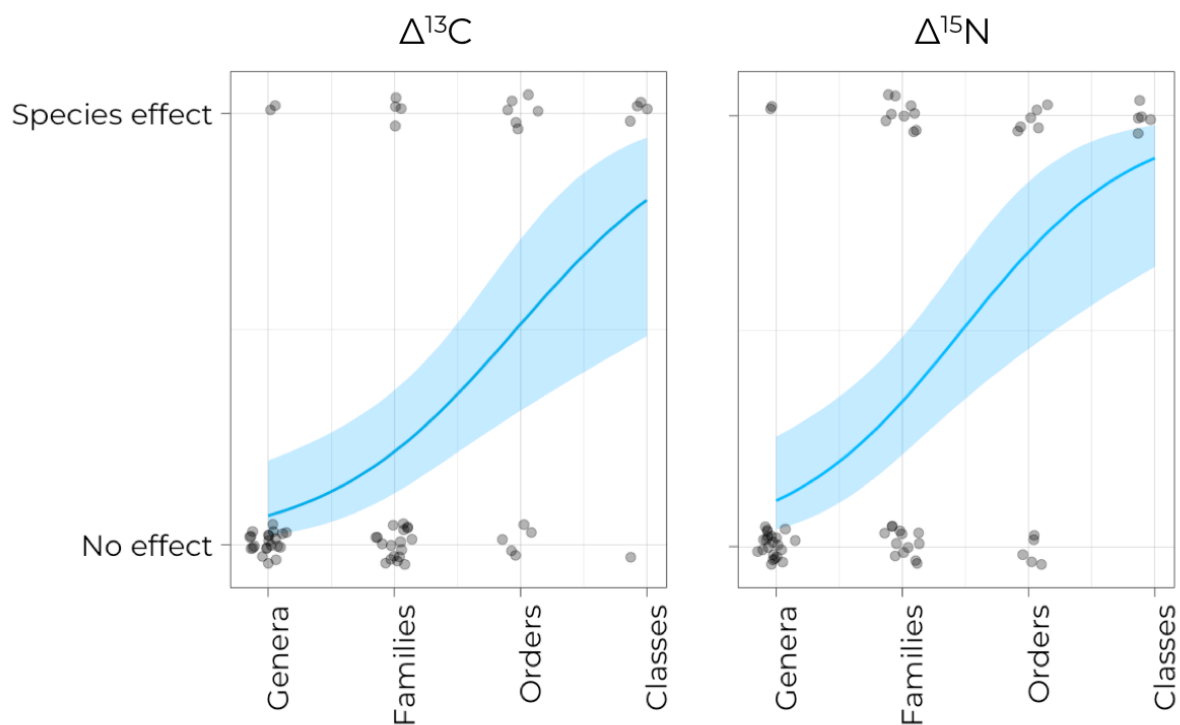

254

255 **Figure 4. Effect of species identity on  $\Delta^{13}\text{C}$  and  $\Delta^{15}\text{N}$  values at different taxonomic levels.**

256 Significant effects of species on population stable isotope composition within the parental taxon  
257 were inspected using ANOVA (Table S3). Only taxa with two or more nested taxa of the lower  
258 taxonomic level were included in the analysis (i.e., species with  $\geq 2$  populations, genera with  $\geq 2$   
259 species, families with  $\geq 2$  genera etc.). Probability of significant effect is illustrated with  
260 binomial smoother; shaded areas show 95% confidence intervals.

261

262 More detailed analysis of high-rank taxa showed that at the level of subphyla, Chelicerata  
263 and Myriapoda were on average enriched in both  $^{13}\text{C}$  and  $^{15}\text{N}$  as compared to Hexapoda (Figs 5,

264 6). There were no differences in  $\Delta^{13}\text{C}$  values between classes within subphyla, but classes within  
265 Myriapoda and Hexapoda were distinct in  $\Delta^{15}\text{N}$  values (Chilopoda vs. Diplopoda and Insecta vs.  
266 Collembola). Further,  $\Delta^{13}\text{C}$  values differed between orders within Arachnida, Insecta and  
267 Collembola, but not within Chilopoda and Diplopoda.  $\Delta^{15}\text{N}$  values clearly differed between  
268 predominantly predatory orders (Mesostigmata, Araneae, Geophilomorpha, Lithobiomorpha,  
269 Coleoptera and Hymenoptera) and predominantly detritivore orders (Oribatida, Julida,  
270 Polydesmida, Entomobryomorpha and Symphypleona). Diptera and Poduromorpha had  
271 intermediate  $\Delta^{15}\text{N}$  values. Significant differences were also found at the family and genus level  
272 of taxonomic resolution (Supplementary materials, Fig. S1-S3).

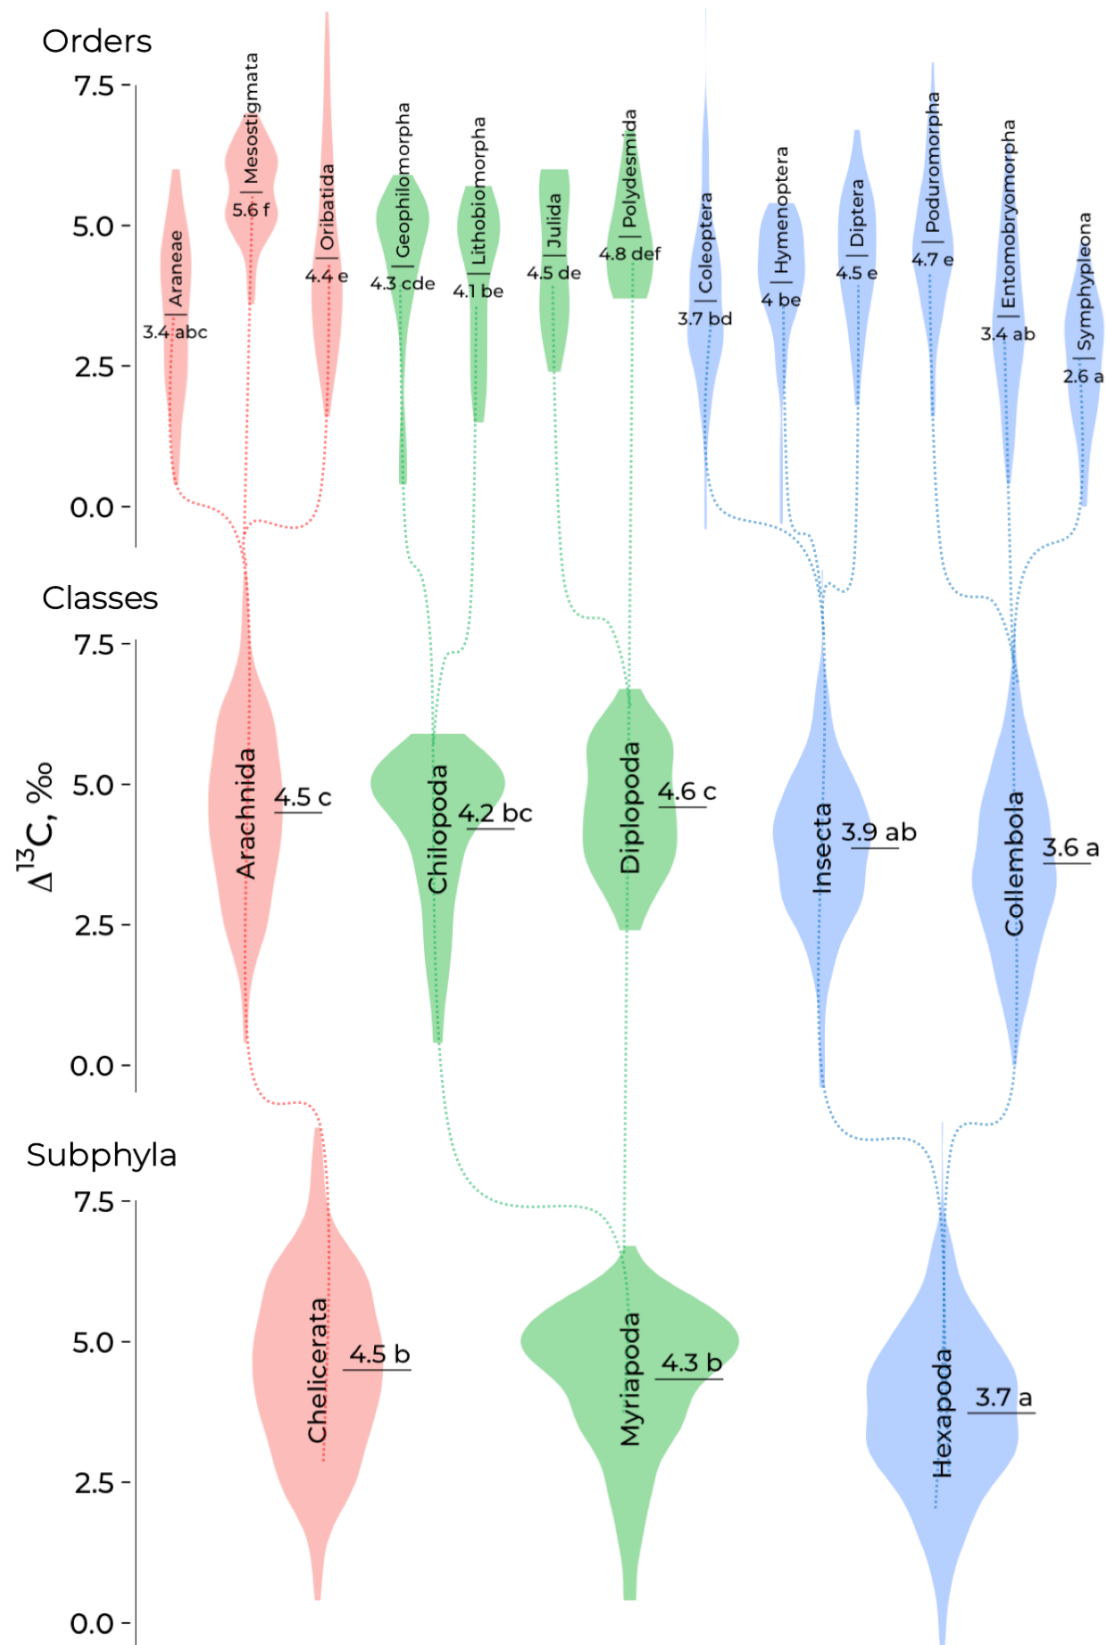

273

274 **Figure 5.  $\Delta^{13}\text{C}$  values of subphyla, classes and orders in three main lineages of soil**  
 275 **arthropods, Chelicerata, Myriapoda and Hexapoda.** Data on populations are presented in the  
 276 form of violin plots (mirrored Kernel density estimation). Mean values are shown with



277 horizontal segments and numbers; mean values sharing the same letter within a taxonomic level  
278 are not significantly different (general linear hypothesis for multiple comparisons). Colours  
279 denote different lineages, dotted lines denote taxon hierarchy.

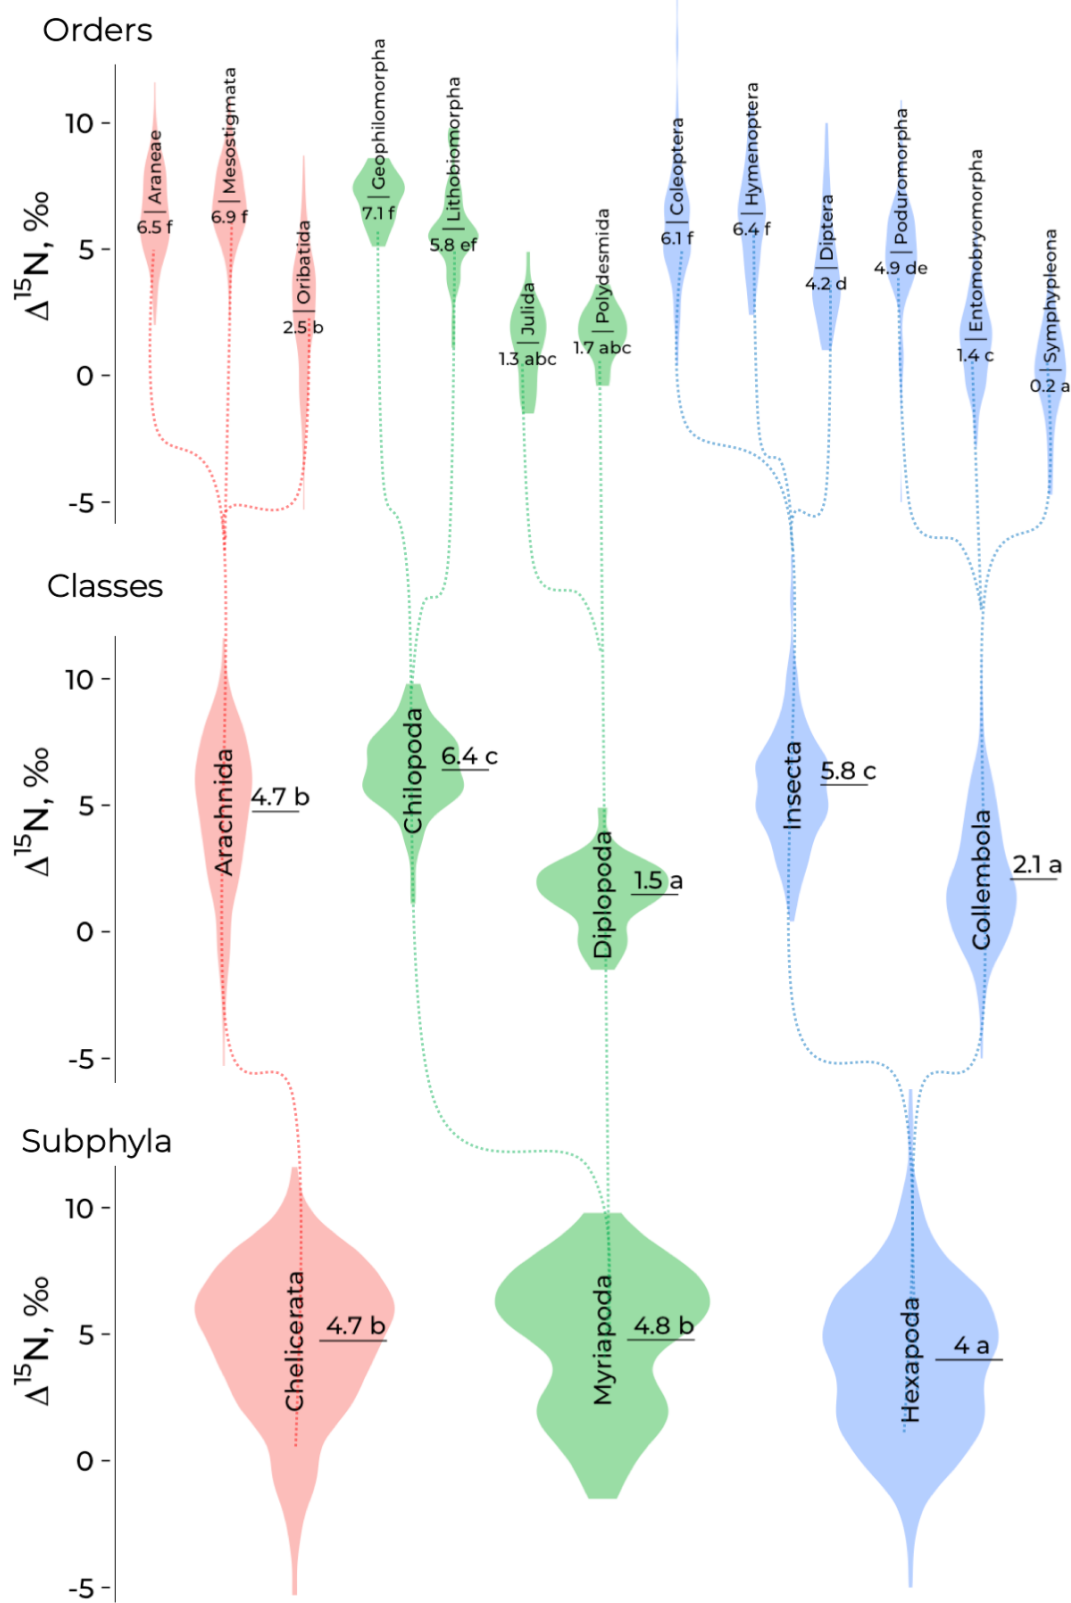

280

281 **Figure 6.  $\Delta^{15}\text{N}$  values of subphyla, classes and orders in three main lineages of soil**  
282 **arthropods, Chelicerata, Myriapoda and Hexapoda.** Data on populations are presented in the  
283 form of violin plots (mirrored Kernel density estimation). Mean values are shown with  
284 horizontal segments and numbers; mean values sharing the same letter within a taxonomic level  
285 are not significantly different (general linear hypothesis for multiple comparisons). Colours  
286 denote different lineages, dotted lines denote taxon hierarchy.

287

## 288 **Discussion**

289       Supraspecific taxa are often assumed to comprise species that perform similar ecological  
290 function. However, this assumption has not been formally tested. Using stable isotope analysis  
291 we found strong support that dissimilarity in trophic level in soil invertebrates is related to  
292 taxonomic dissimilarity, supporting the ‘taxonomic signal’ hypothesis. Trophic level (as  
293 indicated by  $\Delta^{15}\text{N}$  values) was well reflected by taxonomic units, which was mainly due to the  
294 fact that high-order taxa (i.e., class and order level) encompass either detritivores or predators.  
295 The pattern in  $\Delta^{13}\text{C}$  values supported ‘random’ hypothesis, indicating that similar basal resources  
296 can be utilized by various taxonomic groups with different types of body organisation.

297       The distribution of  $\Delta^{13}\text{C}$  and  $\Delta^{15}\text{N}$  values in supraspecific taxa, at least for genera and  
298 families, were on average unimodal and close to normal, indicating that supraspecific taxa are  
299 trophically consistent. Depending on the research question, our finding validates the usage of  
300 supraspecific taxa as functional units in ecological studies if identification to species level is not  
301 feasible. As expected low-rank taxonomic units provide a higher precision and a lower chance of  
302 information loss. Still, due to a high variability within species, the effect of species identity on  
303  $\Delta^{13}\text{C}$  and  $\Delta^{15}\text{N}$  values of populations was not significant in 92% of the tested genera.

304

305       *Basal-resource and trophic-level conservatism in soil food webs*

306           Since we analysed a taxonomic rather than a phylogenetic tree, our conclusions about  
307 evolutionary aspects of trophic niche conservatism are limited. However, the taxonomic tree that  
308 we used reflects well the basic distinction between the main invertebrate lineages/high-rank taxa  
309 (Misof et al., 2014; Rehm et al., 2011; Rota-Stabelli, Daley, & Pisani, 2013). Thus, the  
310 prominent differences in trophic niches for high-rank taxa (orders, classes) suggest that early  
311 evolutionary adaptations played a crucial role in shaping the niches of soil invertebrates.  
312 Similarly, in arbuscular mycorrhizal fungi different colonization and resource exploitation  
313 strategies evolved early during diversification (Powell et al., 2009).

314           Phylogenetic inertia constrain the evolution of ecological niches, but this can be very  
315 different for different niche dimensions. For instance, behavioural adaptations in vertebrates are  
316 quite labile, while morphological adaptations are often evolutionary conserved (Blomberg et al.,  
317 2003; Böhning-Gaese & Oberrath, 1999). The concept of evolutionary conservatism was refined  
318 by Losos (2008) who emphasized that ecological niches are often related to phylogeny and the  
319 question is whether they are more or less conserved than expected by the Brownian motion  
320 model. Both  $\Delta^{13}\text{C}$  and  $\Delta^{15}\text{N}$  values were distributed on the taxonomic tree in a non-random way,  
321 however, we found no evidence that trophic niches are more conserved than expected by  
322 Brownian motion.  $\Delta^{13}\text{C}$  values (reflecting the link to basal resources) were likely evolutionary  
323 convergent in different lineages.  $\Delta^{15}\text{N}$  values (reflecting the trophic level) followed the  
324 Brownian motion.

325           It has been suggested that niche conservatism is reinforced by stabilizing selection due to  
326 the presence of sympatric species which occupy adjacent ecological niches (Ackerly, 2003;  
327 Losos, 2008). Despite soil is one of the most densely populated habitats on Earth, trophic niche  
328 conservatism is not evident. Presumably, the heterogeneous nature of soil provides an array of  
329 microhabitats varying in space, size and time, and therefore reduces competitive interactions  
330 between species (Maaß, Maraun, Scheu, Rillig, & Caruso, 2015; Nielsen et al., 2010). Besides,  
331 the soil environment limits mobility and sensing of chemical cues by predators / consumers,

332 which complicates selective feeding on specific food resources. ‘Convergence’ in  $\Delta^{13}\text{C}$  values in  
333 different taxa suggests that different types of organic compounds (plant tissues or microbially  
334 processed detritus; Potapov et al., 2018) are utilized by an array of different lineages of  
335 consumers resulting in functional redundancy. Resource specialization such as feeding on  
336 different organic matter compounds, therefore is unlikely to drive evolutionary adaptations in  
337 soil invertebrates, suggesting that it is relatively easy to switch between herbivory and detritivory  
338 or between preying on herbivores and decomposers. Such switches have been shown e.g., for  
339 species of Collembola (Endlweber, Ruess, & Scheu, 2009), Chilopoda (Klarner et al., 2017) and  
340 Elateridae (Samoylova & Tiunov, 2017).

341 The stronger taxonomic signal in  $\Delta^{15}\text{N}$  as compared to  $\Delta^{13}\text{C}$  values suggests that  
342 switching between prey of different trophic levels is evolutionary difficult resulting in taxa being  
343 conserved within their trophic level. Despite there are examples of predatory species in  
344 detritivore lineages such as Collembola (Hopkin, 1997; Potapov et al., 2016) and Oribatida  
345 (Heidemann et al., 2014; Maraun et al., 2011), they likely represent only a minority of the  
346 species of these groups. Notably, isotopic dissimilarity increased steadily from the species to the  
347 class level, but decreased thereafter, suggesting that the differences in trophic level between taxa  
348 were established early in the evolution of these lineages, i.e. during the colonisation of land by  
349 the major arthropod lineages, and diversification within these lineages was associated by  
350 refinement of trophic niches (Rota-Stabelli et al., 2013; Schaefer, Norton, Scheu, & Maraun,  
351 2010).

352

### 353 *Taxonomic sufficiency in soil food-web studies*

354 Species is a keystone but one of the most debated concepts in biology. For instance, the  
355 increasing recognition of cryptic species challenges morphology as the criterion for species  
356 delineation (Fišer, Robinson, & Malard, 2018). However, virtually all animal and plant taxa are  
357 described based on morphology (Cook, Edwards, Crisp, & Hardy, 2010). Taxonomists delineate

358 supraspecific taxa from each other in order to establish a system of morphologically consistent  
359 units. Normal and unimodal distributions of isotopic niches of genera and even families, suggest  
360 that the taxonomic system developed for soil invertebrates is consistent also in ecological  
361 functions and thus may be used in ecological studies. This, however, needs to be done with  
362 caution since each question addressed may deserve its own level of taxonomic resolution  
363 (Bhusal, Kallimanis, Tsiafouli, & Sgardelis, 2014; Timms et al., 2013). To facilitate selection of  
364 the adequate taxonomic level for respective research questions we provide a list of mean  $\Delta^{13}\text{C}$   
365 and  $\Delta^{15}\text{N}$  values of soil invertebrates from temperate forests from species to class level of  
366 taxonomic resolution and classified the records according to their reliability and trophic  
367 flexibility in the Appendix (Tables S1-S4).

368       Among taxa, maximum information on the structure of trophic niches is obtained at the  
369 species level of taxonomic resolution. Nevertheless, our data suggest that species identity in soil  
370 communities provides little additional information relative to the respective genera. In 92% of  
371 cases stable isotope composition of congeneric species was not significantly different and the  
372 mean offset of populations within genera was only 0.1‰ higher than that of populations within  
373 species. For instance, trophic niches in congeneric species of Chilopoda and Lumbricidae were  
374 shown to be similar (Ferlian, Scheu, & Pollierer, 2012; Schmidt, Curry, Dyckmans, Rota, &  
375 Scrimgeour, 2004). Also, congeneric species of Collembola and Oribatida typically have similar  
376 stable isotope composition, although there are exceptions (Potapov et al., 2016; Schneider et al.,  
377 2004). The cases in which the stable isotope composition of congeneric species differed  
378 significantly (8%) were distributed across a variety of taxa including Oribatida, Collembola and  
379 Formicidae (see Table S2). Niche differentiation among congeneric species may in part be  
380 explained by morphological variability within genera, pointing to the need to disclose  
381 relationships between morphological traits and feeding habits of soil invertebrates in future  
382 studies (Malcicka, Berg, & Ellers, 2017; Potapov et al., 2016).

383           The rather small loss of information on trophic niches when using genera instead of  
384 species in large was due to the high variability in stable isotope composition among populations  
385 within species, which was emphasized before (Lehmitz & Maraun, 2016; Tillberg, McCarthy,  
386 Dolezal, & Suarez, 2006; Zalewski et al., 2014). A recent study based on molecular gut content  
387 analysis of three morphologically similar species of Collembola showed high diversity and  
388 temporal variability in their fungal diet, but no significant differences in feeding habits were  
389 found between species across locations and seasons (Anslan, Bahram, & Tedersoo, 2018).  
390 Clearly, the trophic niche of species / taxa in a given community will always depend on the  
391 biotic and abiotic environment and it is preferable to explicitly study the trophic niches of  
392 species of the community investigated.

393            $\Delta^{13}\text{C}$  and  $\Delta^{15}\text{N}$  values of species within families were not different in 80 - 60% of the  
394 cases indicating that trophic niches of species are not well represented using families as  
395 functional units as suggested e.g., for Mesostigmata in grasslands (Walter & Ikonen, 1989). The  
396 trophic differentiation of species / taxa showed different trends in the three major lineages of soil  
397 arthropods. Chelicerata (represented by Arachnida) and Myriapoda were enriched in  $^{13}\text{C}$  and  $^{15}\text{N}$   
398 as compared to Hexapoda, with the enrichment being on average 0.8‰ for both  $\Delta^{13}\text{C}$  and  $\Delta^{15}\text{N}$   
399 values. However, large variations in  $^{13}\text{C}$  and  $^{15}\text{N}$  values suggest large variability in trophic niches  
400 in each of the three lineages. Myriapoda in our dataset comprised two classes, i.e. Diplopoda and  
401 Chilopoda feeding on very different resources, i.e. dead organic matter and animal prey,  
402 respectively. Arachnida in our dataset comprised Oribatida, predominantly living as detritivores  
403 and fungal feeders, and Mesostigmata and Araneae living as predators. In Hexapoda the trophic  
404 niche varied between classes (Insecta vs. Collembola) and also between orders. Presumably, this  
405 is related to the high diversity of Hexapoda exceeding that of Arachnida and Myriapoda (Zhang,  
406 2011). Notably, the  $\Delta^{13}\text{C}$  and  $\Delta^{15}\text{N}$  values of species-rich taxa such as Coleoptera varied  
407 markedly due to including taxa of very different trophic position such as Carabidae living mainly  
408 as predators and Tenebrionidae living mainly as detritivores (Table S1). This supports the notion

409 that species- and genus-rich families need to be resolved at higher taxonomic resolution to  
410 adequately represent their trophic position (Jiang et al., 2013; Timms et al., 2013). A wider range  
411 of niches in species-rich taxa illustrates a close link between morphological and ecological  
412 diversification. The diversification of lineages is driven primarily by the occupation of new niche  
413 space (Gavrilets & Losos, 2009; Mahler, Revell, Glor, & Losos, 2010). During the long  
414 evolutionary history of old lineages, some lineages, such as Insecta, managed to exploit novel  
415 resources / prey species thereby radiating markedly, whereas other lineages, such as Diplopoda  
416 and Chilopoda, remained confined to their trophic niche and remained less species rich.  
417 Therefore, using supraspecific taxa as functional units in ecological studies needs to consider the  
418 degree of ecological diversification of the different lineages rather than using a uniform  
419 taxonomic level across the taxa studied. Including  $\Delta^{13}\text{C}$  and  $\Delta^{15}\text{N}$  values as continuous variables  
420 allows to refine classic food-web models based on discrete trophic levels and to include  
421 omnivory and intraguild predation which are of significant importance for food web dynamics in  
422 soil (Digel et al., 2014).

423

## 424 **Conclusions**

425 Soil animals that are sharing similar taxonomic affiliation and therefore morphology are  
426 also sharing similar trophic niches. Blomberg's K criteria suggest that feeding on different basal  
427 resources (plants or detritus) is 'convergent' across different lineages of soil invertebrates  
428 whereas the occupation of different trophic levels followed the Brownian-motion taxonomic  
429 model. We found no evidence for strict trophic niche conservatism in soil invertebrates.

430 Although higher taxonomic resolution provides more information on feeding habits, in  
431 92% of the cases stable isotope values of congeneric species of soil invertebrates did not differ  
432 significantly. This small loss of information was due to the high variability in stable isotope  
433 composition between populations within species. Nevertheless, trophic niches of populations  
434 within genera and families fitted normal and unimodal distributions, suggesting trophic

435 consistency of these supraspecific taxa. Supraspecific taxa can serve as meaningful functional  
436 units in ecological studies, but the choice of taxonomic resolution needs to be adopted based on  
437 the particular research question and taxonomic group. In particular, diverse groups, such as  
438 Oribatida, Collembola and Coleoptera, deserve higher taxonomic resolution. Further studies need  
439 to explore how and why trophic radiation varies between lineages. The compiled list of mean  
440  $\Delta^{13}\text{C}$  and  $\Delta^{15}\text{N}$  values of taxa can be combined with other literature data in order to infer feeding  
441 habits of soil invertebrates and move towards more realistic soil food-web models.

442

#### 443 **Acknowledgements**

444 The study was supported by the Russian Foundation for Basic Research, Project #18-04-01200  
445 and in part by the Deutsche Forschungsgemeinschaft (DFG) in the framework of the  
446 Collaborative Research Centre CRC 990. We thank Ting-Wen Chen for advices on data analysis.

447

#### 448 **Author contributions statement**

449 AP analysed the data and worked on the drafts. AP, AT and SS conceived and refined the ideas.  
450 All authors contributed critically to the drafts and gave final approval for publication.

451

#### 452 **Data accessibility statement**

453 Should the manuscript be accepted, the data supporting the results will be archived in a public  
454 repository and the data DOI will be included at the end of the article.

455

#### 456 **References**

457 Ackerly, D. D. (2003). Community assembly, niche conservatism, and adaptive evolution in  
458 changing environments. *International Journal of Plant Sciences*, 164(S3), S165–S184.



- 459 Anslan, S., Bahram, M., & Tedersoo, L. (2018). Seasonal and annual variation in fungal  
460 communities associated with epigeic springtails (*Collembola* spp.) in boreal forests. *Soil Biology  
461 and Biochemistry*, *116*(Supplement C), 245–252. doi:10.1016/j.soilbio.2017.10.021
- 462 Berg, M. P., & Bengtsson, J. (2007). Temporal and spatial variability in soil food web structure.  
463 *Oikos*, *116*(11), 1789–1804. doi:10.1111/j.2007.0030-1299.15748.x
- 464 Bhusal, D. R., Kallimanis, A. S., Tsiafouli, M. A., & Sgardelis, S. P. (2014). Higher taxa vs.  
465 functional guilds vs. trophic groups as indicators of soil nematode diversity and community  
466 structure. *Ecological Indicators*, *41*, 25–29. doi:10.1016/j.ecolind.2014.01.019
- 467 Blomberg, S. P., & Garland, T. (2002). Tempo and mode in evolution: phylogenetic inertia,  
468 adaptation and comparative methods. *Journal of Evolutionary Biology*, *15*(6), 899–910.
- 469 Blomberg, S. P., Garland, T., Ives, A. R., & Crespi, B. (2003). Testing for phylogenetic signal in  
470 comparative data: behavioral traits are more labile. *Evolution*, *57*(4), 717–745.  
471 doi:10.1554/0014-3820(2003)057[0717:TFPSIC]2.0.CO;2
- 472 Boecklen, W. J., Yarnes, C. T., Cook, B. A., & James, A. C. (2011). On the Use of Stable  
473 Isotopes in Trophic Ecology. *Annual Review of Ecology, Evolution, and Systematics*, *42*(1), 411–  
474 440. doi:10.1146/annurev-ecolsys-102209-144726
- 475 Böhning-Gaese, K., & Oberrath, R. (1999). Phylogenetic effects on morphological, life-history,  
476 behavioural and ecological traits of birds. *Evolutionary Ecology Research*, *1*(3), 347–364.
- 477 Chahartaghi, M., Langel, R., Scheu, S., & Ruess, L. (2005). Feeding guilds in *Collembola* based  
478 on nitrogen stable isotope ratios. *Soil Biology and Biochemistry*, *37*(9), 1718–1725.  
479 doi:10.1016/j.soilbio.2005.02.006
- 480 Chernov, Y. I. (2008). Ecological integrity of supraspecific taxa and the arctic biota.  
481 *Entomological Review*, *88*(9), 1019–1031. doi:10.1134/S0013873808090017
- 482 Cook, L. G., Edwards, R. D., Crisp, M. D., & Hardy, N. B. (2010). Need morphology always be  
483 required for new species descriptions? *Invertebrate Systematics*, *24*(3), 322.  
484 doi:10.1071/IS10011

- 485 Darwin, C. (1876). *The origin of species by means of natural selection, or the preservation of*  
486 *favoured races in the struggle for life (6th edition, with additions and corrections)* (John Murray,  
487 Vols. 1–1). London. Retrieved from  
488 [http://www.ourfavouritebooks.co.uk/downloadindiv/darwin/On%20The%20Origin%20of%20Sp](http://www.ourfavouritebooks.co.uk/downloadindiv/darwin/On%20The%20Origin%20of%20Species.pdf)  
489 [ecies.pdf](http://www.ourfavouritebooks.co.uk/downloadindiv/darwin/On%20The%20Origin%20of%20Species.pdf)
- 490 de Ruiter, P. C., Neutel, A.-M., & Moore, J. C. (1994). Modelling food webs and nutrient  
491 cycling in agro-ecosystems. *Trends in Ecology & Evolution*, 9(10), 378–383. doi:10.1016/0169-  
492 5347(94)90059-0
- 493 de Vries, F. T., Thebault, E., Liiri, M., Birkhofer, K., Tsiafouli, M. A., Bjornlund, L., ...  
494 Bardgett, R. D. (2013). Soil food web properties explain ecosystem services across European  
495 land use systems. *Proceedings of the National Academy of Sciences of the United States of*  
496 *America*, 110(35), 14296–14301. doi:10.1073/pnas.1305198110
- 497 Digel, C., Curtsdotter, A., Riede, J., Klarner, B., & Brose, U. (2014). Unravelling the complex  
498 structure of forest soil food webs: higher omnivory and more trophic levels. *Oikos*, 123(10),  
499 1157–1172. doi:10.1111/oik.00865
- 500 Dray, S., Dufour, A.-B., & others. (2007). The ade4 package: implementing the duality diagram  
501 for ecologists. *Journal of Statistical Software*, 22(4), 1–20.
- 502 Eklöf, A., & Stouffer, D. B. (2016). The phylogenetic component of food web structure and  
503 intervality. *Theoretical Ecology*, 9(1), 107–115. doi:10.1007/s12080-015-0273-9
- 504 Ellis, D. (1985). Taxonomic sufficiency in pollution assessment. *Marine Pollution Bulletin*,  
505 16(12), 459.
- 506 Endlweber, K., Ruess, L., & Scheu, S. (2009). Collembola switch diet in presence of plant roots  
507 thereby functioning as herbivores. *Soil Biology and Biochemistry*, 41(6), 1151–1154.  
508 doi:10.1016/j.soilbio.2009.02.022

- 509 Ferlian, O., Scheu, S., & Pollierer, M. M. (2012). Trophic interactions in centipedes (Chilopoda,  
510 Myriapoda) as indicated by fatty acid patterns: Variations with life stage, forest age and season.  
511 *Soil Biology and Biochemistry*, 52, 33–42. doi:10.1016/j.soilbio.2012.04.018
- 512 Fišer, C., Robinson, C. T., & Malard, F. (2018). Cryptic species as a window into the paradigm  
513 shift of the species concept. *Molecular Ecology*, 27(3), 613–635. doi:10.1111/mec.14486
- 514 Gavrilets, S., & Losos, J. B. (2009). Adaptive Radiation: Contrasting Theory with Data. *Science*,  
515 323(5915), 732–737. doi:10.1126/science.1157966
- 516 Gómez, J. M., Verdú, M., & Perfectti, F. (2010). Ecological interactions are evolutionarily  
517 conserved across the entire tree of life. *Nature*, 465(7300), 918–921. doi:10.1038/nature09113
- 518 Heidemann, K., Hennies, A., Schakowske, J., Blumenberg, L., Ruess, L., Scheu, S., & Maraun,  
519 M. (2014). Free-living nematodes as prey for higher trophic levels of forest soil food webs.  
520 *Oikos*, 123(10), 1199–1211. doi:10.1111/j.1600-0706.2013.00872.x
- 521 Hopkin, S. P. (1997). *Biology of springtails: (Insecta: Collembola)*. Oxford: Oxford Science  
522 Publications.
- 523 Hothorn, T., Bretz, F., & Westfall, P. (2008). Simultaneous Inference in General Parametric  
524 Models. *Biometrical Journal*, 50(3), 346–363. doi:10.1002/bimj.200810425
- 525 Jiang, X., Xiong, J., Song, Z., Morse, J. C., Jones, F. C., & Xie, Z. (2013). Is coarse taxonomy  
526 sufficient for detecting macroinvertebrate patterns in floodplain lakes? *Ecological Indicators*, 27,  
527 48–55. doi:10.1016/j.ecolind.2012.11.015
- 528 Klarner, B., Ehnes, R. B., Erdmann, G., Eitzinger, B., Pollierer, M. M., Maraun, M., & Scheu, S.  
529 (2014). Trophic shift of soil animal species with forest type as indicated by stable isotope  
530 analysis. *Oikos*, 123(10), 1173–1181. doi:10.1111/j.1600-0706.2013.00939.x
- 531 Klarner, B., Winkelmann, H., Krashevskaya, V., Maraun, M., Widyastuti, R., & Scheu, S. (2017).  
532 Trophic niches, diversity and community composition of invertebrate top predators (Chilopoda)  
533 as affected by conversion of tropical lowland rainforest in Sumatra (Indonesia). *PloS One*, 12(8),  
534 e0180915. doi:10.1371/journal.pone.0180915

- 535 Lehmitz, R., & Maraun, M. (2016). Small-scale spatial heterogeneity of stable isotopes  
536 signatures ( $\delta^{15}\text{N}$ ,  $\delta^{13}\text{C}$ ) in Sphagnum sp. transfers to all trophic levels in oribatid mites. *Soil*  
537 *Biology and Biochemistry*, *100*, 242–251. doi:10.1016/j.soilbio.2016.06.005
- 538 Losos, J. B. (2008). Phylogenetic niche conservatism, phylogenetic signal and the relationship  
539 between phylogenetic relatedness and ecological similarity among species. *Ecology Letters*,  
540 *11*(10), 995–1003. doi:10.1111/j.1461-0248.2008.01229.x
- 541 Lujan, N. K., Winemiller, K. O., & Armbruster, J. W. (2012). Trophic diversity in the evolution  
542 and community assembly of loricariid catfishes. *BMC Evolutionary Biology*, *12*(1), 124.
- 543 Maaß, S., Maraun, M., Scheu, S., Rillig, M. C., & Caruso, T. (2015). Environmental filtering vs.  
544 resource-based niche partitioning in diverse soil animal assemblages. *Soil Biology and*  
545 *Biochemistry*, *85*, 145–152. doi:10.1016/j.soilbio.2015.03.005
- 546 Maechler, M., Rousseeuw, P., Struyf, A., Hubert, M., & Hornik, K. (2017). *cluster: Cluster*  
547 *Analysis Basics and Extensions. R package version 2.0. 1. 2015*. Retrieved from  
548 <http://scholar.google.com/scholar?cluster=3901379780812636433&hl=en&oi=scholar>
- 549 Mahler, D. L., Revell, L. J., Glor, R. E., & Losos, J. B. (2010). Ecological Opportunity and the  
550 Rate of Morphological Evolution in the Diversification of Greater Antillean Anoles. *Evolution*,  
551 *64*(9), 2731–2745. doi:10.1111/j.1558-5646.2010.01026.x
- 552 Malcicka, M., Berg, M. P., & Ellers, J. (2017). Ecomorphological adaptations in Collembola in  
553 relation to feeding strategies and microhabitat. *European Journal of Soil Biology*, *78*, 82–91.  
554 doi:10.1016/j.ejsobi.2016.12.004
- 555 Maraun, M., Erdmann, G., Fischer, B. M., Pollierer, M. M., Norton, R. A., Schneider, K., &  
556 Scheu, S. (2011). Stable isotopes revisited: Their use and limits for oribatid mite trophic ecology.  
557 *Soil Biology and Biochemistry*, *43*(5), 877–882. doi:10.1016/j.soilbio.2011.01.003
- 558 Martinez del Rio, C., Wolf, N., Carleton, S. A., & Gannes, L. Z. (2009). Isotopic ecology ten  
559 years after a call for more laboratory experiments. *Biological Reviews*, *84*(1), 91–111.  
560 doi:10.1111/j.1469-185X.2008.00064.x

- 561 Minor, M. A., Ermilov, S. G., & Tiunov, A. V. (2017). Taxonomic resolution and functional  
562 traits in the analysis of tropical oribatid mite assemblages. *Experimental and Applied Acarology*,  
563 73(3–4), 365–381. doi:10.1007/s10493-017-0190-2
- 564 Misof, B., Liu, S., Meusemann, K., Peters, R. S., Donath, A., Mayer, C., ... others. (2014).  
565 Phylogenomics resolves the timing and pattern of insect evolution. *Science*, 346(6210), 763–767.
- 566 Newsome, S. D., Martinez del Rio, C., Bearhop, S., & Phillips, D. L. (2007). A niche for isotopic  
567 ecology. *Frontiers in Ecology and the Environment*, 5(8), 429–436.
- 568 Nielsen, U. N., Osler, G. H. R., Campbell, C. D., Neilson, R., Burslem, D. F. R. P., & van der  
569 Wal, R. (2010). The Enigma of Soil Animal Species Diversity Revisited: The Role of Small-  
570 Scale Heterogeneity. *PLoS ONE*, 5(7), e11567. doi:10.1371/journal.pone.0011567
- 571 Paradis, E., Claude, J., & Strimmer, K. (2004). APE: analyses of phylogenetics and evolution in  
572 R language. *Bioinformatics*, 20(2), 289–290.
- 573 Peterson, B. J., & Fry, B. (1987). Stable Isotopes in Ecosystem Studies. *Annual Review of*  
574 *Ecology and Systematics*, 18(1), 293–320. doi:10.1146/annurev.es.18.110187.001453
- 575 Pohlert, T. (2014). *The Pairwise Multiple Comparison of Mean Ranks Package (PMCMR)*.  
576 Retrieved from <http://CRAN.R-project.org/package=PMCMR>
- 577 Potapov, A. M., Semenina, E. E., Korotkevich, A. Y., Kuznetsova, N. A., & Tiunov, A. V.  
578 (2016). Connecting taxonomy and ecology: Trophic niches of collembolans as related to  
579 taxonomic identity and life forms. *Soil Biology and Biochemistry*, 101, 20–31.  
580 doi:10.1016/j.soilbio.2016.07.002
- 581 Potapov, A. M., Tiunov, A. V., & Scheu, S. (2018). Uncovering trophic positions and food  
582 resources of soil animals using bulk natural stable isotope composition. *Biological Reviews*.  
583 doi:10.1111/brv.12434
- 584 Powell, J. R., Parrent, J. L., Hart, M. M., Klironomos, J. N., Rillig, M. C., & Maherali, H.  
585 (2009). Phylogenetic trait conservatism and the evolution of functional trade-offs in arbuscular

- 586 mycorrhizal fungi. *Proceedings of the Royal Society of London B: Biological Sciences*,  
587 276(1676), 4237–4245. doi:10.1098/rspb.2009.1015
- 588 Pyron, R. A., Costa, G. C., Patten, M. A., & Burbrink, F. T. (2015). Phylogenetic niche  
589 conservatism and the evolutionary basis of ecological speciation: Niche conservatism and  
590 speciation. *Biological Reviews*, 90(4), 1248–1262. doi:10.1111/brv.12154
- 591 R Core Team. (2017). R: A language and environment for statistical computing. Retrieved  
592 January 1, 2017, from <http://www.R-project.org>
- 593 Rehm, P., Borner, J., Meusemann, K., von Reumont, B. M., Simon, S., Hadrys, H., ...  
594 Burmester, T. (2011). Dating the arthropod tree based on large-scale transcriptome data.  
595 *Molecular Phylogenetics and Evolution*, 61(3), 880–887.
- 596 Revell, L. J. (2012). phytools: an R package for phylogenetic comparative biology (and other  
597 things). *Methods in Ecology and Evolution*, 3(2), 217–223.
- 598 Rezende, E. L., Lavabre, J. E., Guimarães, P. R., Jordano, P., & Bascompte, J. (2007). Non-  
599 random coextinctions in phylogenetically structured mutualistic networks. *Nature*, 448(7156),  
600 925–928.
- 601 Rodríguez, M. A., & Herrera, L. G. (2013). Isotopic niche mirrors trophic niche in a vertebrate  
602 island invader. *Oecologia*, 171(2), 537–544. doi:10.1007/s00442-012-2423-8
- 603 Rota-Stabelli, O., Daley, A. C., & Pisani, D. (2013). Molecular timetrees reveal a Cambrian  
604 colonization of land and a new scenario for ecdysozoan evolution. *Current Biology*, 23(5), 392–  
605 398.
- 606 Samoylova, E. S., & Tiunov, A. V. (2017). Flexible trophic position of polyphagous wireworms  
607 (Coleoptera, Elateridae): A stable isotope study in the steppe belt of Russia. *Applied Soil*  
608 *Ecology*, 121, 74–81. doi:10.1016/j.apsoil.2017.09.026
- 609 Schaefer, I., Norton, R. A., Scheu, S., & Maraun, M. (2010). Arthropod colonization of land–  
610 Linking molecules and fossils in oribatid mites (Acari, Oribatida). *Molecular Phylogenetics and*  
611 *Evolution*, 57(1), 113–121.

- 612 Schmidt, O., Curry, J. P., Dyckmans, J., Rota, E., & Scrimgeour, C. M. (2004). Dual stable  
613 isotope analysis ( $\delta^{13}\text{C}$  and  $\delta^{15}\text{N}$ ) of soil invertebrates and their food sources. *Pedobiologia*,  
614 48(2), 171–180. doi:10.1016/j.pedobi.2003.12.003
- 615 Schneider, K., Migge, S., Norton, R. A., Scheu, S., Langel, R., Reineking, A., & Maraun, M.  
616 (2004). Trophic niche differentiation in soil microarthropods (Oribatida, Acari): evidence from  
617 stable isotope ratios ( $^{15}\text{N}/^{14}\text{N}$ ). *Soil Biology and Biochemistry*, 36(11), 1769–1774.
- 618 Simberloff, D., & Dayan, T. (1991). The guild concept and the structure of ecological  
619 communities. *Annual Review of Ecology and Systematics*, 22(1), 115–143.
- 620 Terlizzi, A., Bevilacqua, S., Frascchetti, S., & Boero, F. (2003). Taxonomic sufficiency and the  
621 increasing insufficiency of taxonomic expertise. *Marine Pollution Bulletin*, 46(5), 556–561.  
622 doi:10.1016/S0025-326X(03)00066-3
- 623 Tillberg, C. V., McCarthy, D. P., Dolezal, A. G., & Suarez, A. V. (2006). Measuring the trophic  
624 ecology of ants using stable isotopes. *Insectes Sociaux*, 53(1), 65–69. doi:10.1007/s00040-005-  
625 0836-7
- 626 Timms, L. L., Bowden, J. J., Summerville, K. S., & Buddle, C. M. (2013). Does species-level  
627 resolution matter? Taxonomic sufficiency in terrestrial arthropod biodiversity studies. *Insect  
628 Conservation and Diversity*, 6(4), 453–462. doi:10.1111/icad.12004
- 629 Violle, C., Nemergut, D. R., Pu, Z., & Jiang, L. (2011). Phylogenetic limiting similarity and  
630 competitive exclusion: Phylogenetic relatedness and competition. *Ecology Letters*, 14(8), 782–  
631 787. doi:10.1111/j.1461-0248.2011.01644.x
- 632 Wainwright, P. C., & Richard, B. A. (1995). Predicting patterns of prey use from morphology of  
633 fishes. *Environmental Biology of Fishes*, 44(1–3), 97–113. doi:10.1007/BF00005909
- 634 Walter, D. E., & Ikonen, E. K. (1989). Species, Guilds, and Functional Groups: Taxonomy and  
635 Behavior in Nematophagous Arthropods. *Journal of Nematology*, 21(3), 315–327.
- 636 Webb, C. O. (2000). Exploring the phylogenetic structure of ecological communities: an  
637 example for rain forest trees. *The American Naturalist*, 156(2), 145–155.



- 638 Webb, C. O., Ackerly, D. D., McPeck, M. A., & Donoghue, M. J. (2002). Phylogenies and  
639 Community Ecology. *Annual Review of Ecology and Systematics*, 33(1), 475–505.  
640 doi:10.1146/annurev.ecolsys.33.010802.150448
- 641 Zalewski, M., Dudek, D., Tiunov, A. V., Godeau, J.-F., Okuzaki, Y., Ikeda, H., ... Ulrich, W.  
642 (2014). High Niche Overlap in the Stable Isotope Space Of Ground Beetles. *Annales Zoologici*  
643 *Fennici*, 51(3), 301–312. doi:10.5735/086.051.0302
- 644 Zhang, Z.-Q. (2011). *Animal biodiversity: an outline of higher-level classification and survey of*  
645 *taxonomic richness*. Auckland, N.Z.: Magnolia Press.
- 646
